# Supplementary material for: Ag dendritic nanostructures for rapid detection of thiram based on surface-enhanced Raman scattering
Source: Royal Society of Chemistry journal article supplement (doi:10.1039/c5ra13080h), 2015-01-01
Supplement: c5ra13080h1.pdf [file c5ra13080h1.pdf]

# Supporting Information of

## Ag dendritic nanostructures for rapid detection of thiram based on surface-enhanced Raman scattering

Qiang Wang\*, Dun Wu, Zhidong Chen

*Department of Materials Science and Engineering, Changzhou University, 243164, Changzhou, Jiangsu, P.R. China.*

*E-mail: wq@cczu.edu.cn; Tel: +86-519-86330100*

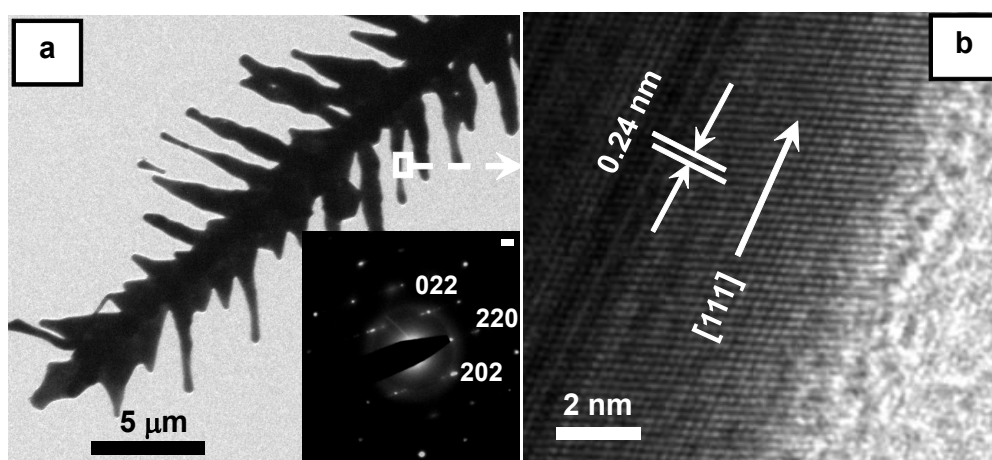

Figure S1. (a) TEM images of the Ag dendritic structure, the insert shows the corresponding FFT pattern of the single dendritic structure. b) HRTEM image of the marked part in Figure S1(a).

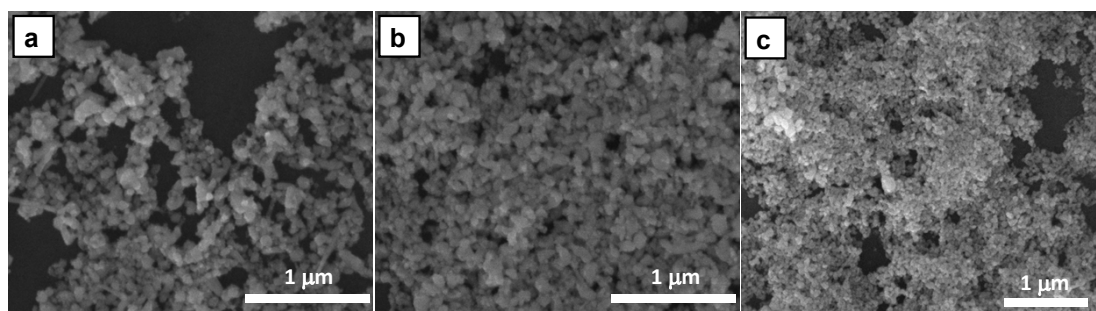

Figure S2. The Ag samples obtained with different reduced agents: (a) citrate sodium, (b) NaBH<sub>4</sub>, and (c) iron.

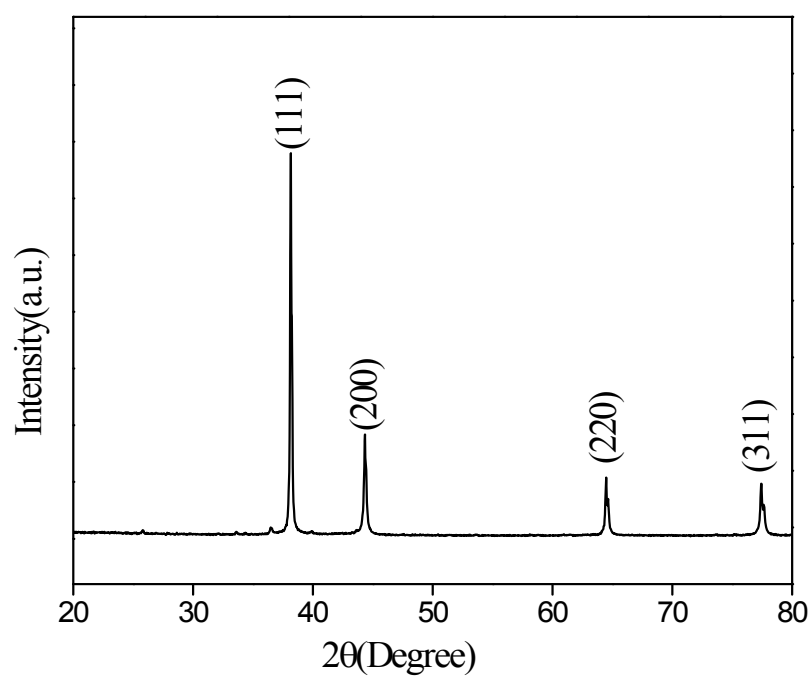

Figure S3. XRD pattern of the as-obtained Ag dendritic nanostructures.

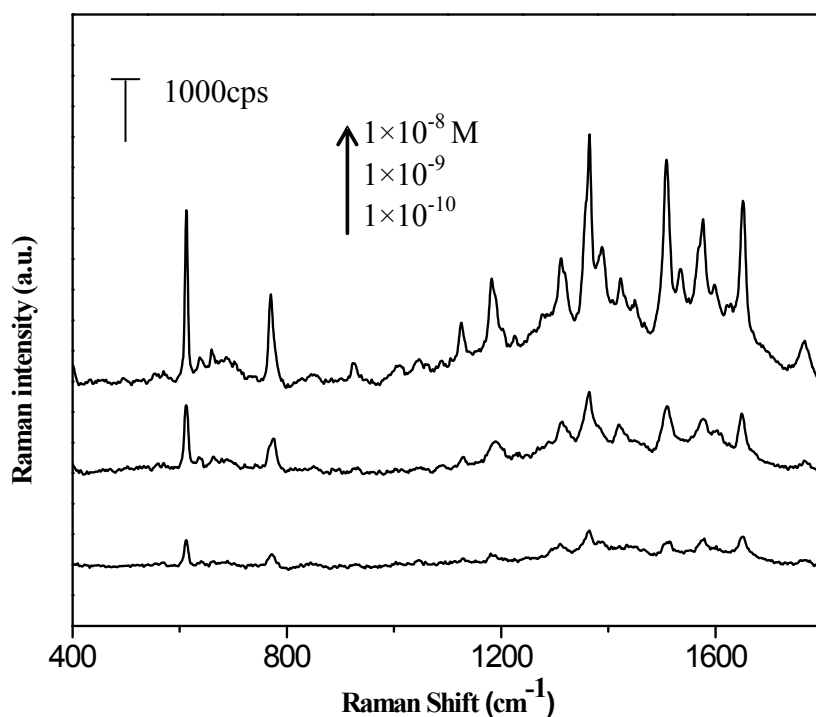

Figure S4. SERS spectra of different concentrations of R6G in ethanol dispersed on the Ag dendrites.

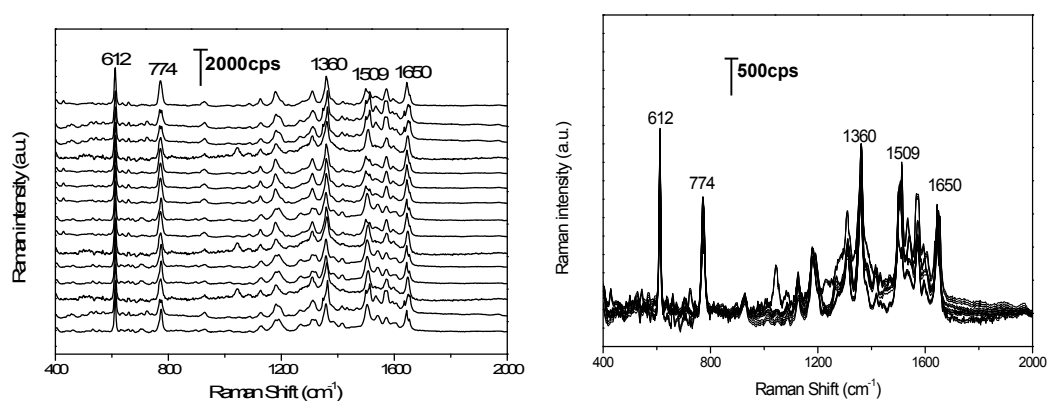

Figure S5. The SERS spectra of R6G at the concentration of  $1 \times 10^{-10}$  M from 15 random spots by using the Ag dendritic structures as the enhanced substrate.

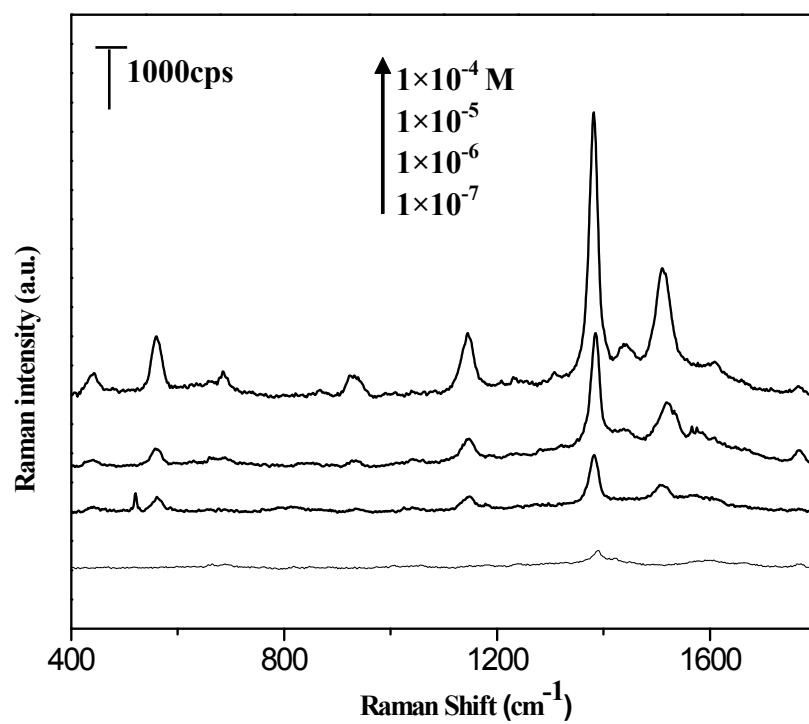

Figure S6. SERS spectra of thiram in ultrapure water at different spiked concentrations on Ag dendrites.

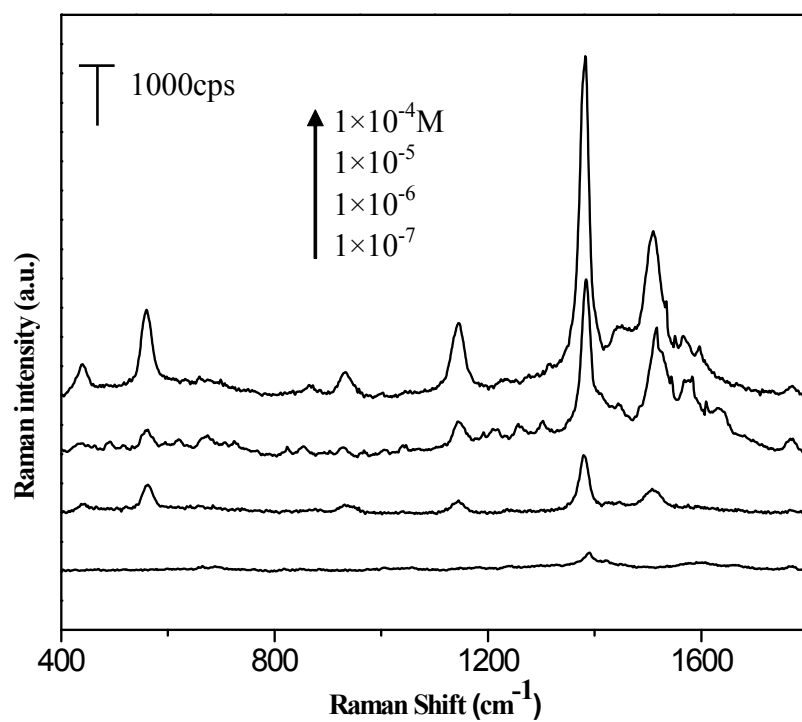

Figure S7. SERS spectra of thiram in lake water at different spiked concentrations on Ag dendrites.
